# Supplementary material
Source: publisher figshare collection journal article supplement (https://acs.figshare.com/ndownloader/files/4039258)
Supplement: Supplementary file 1 [file 4039258]

**Table S1.** List of relevant equations and related description for **NRHB** model.

| Description                                                                                                                                                                                                                                                                      | Mathematical expression                                                                                                                                                                                                                                                                                                                                                                                                                                                                                                                                                                                                                                                                                                                                                                                                                                                                                                                                                                                                                                                                                                                                                                                                                                                                                                                           |
|----------------------------------------------------------------------------------------------------------------------------------------------------------------------------------------------------------------------------------------------------------------------------------|---------------------------------------------------------------------------------------------------------------------------------------------------------------------------------------------------------------------------------------------------------------------------------------------------------------------------------------------------------------------------------------------------------------------------------------------------------------------------------------------------------------------------------------------------------------------------------------------------------------------------------------------------------------------------------------------------------------------------------------------------------------------------------------------------------------------------------------------------------------------------------------------------------------------------------------------------------------------------------------------------------------------------------------------------------------------------------------------------------------------------------------------------------------------------------------------------------------------------------------------------------------------------------------------------------------------------------------------------|
| <p>S1. Phase equilibrium condition on penetrant chemical potential. The expression for chemical potential is given in a general form which is valid for both pure penetrant (<math>\phi_1=1</math>) in the gas phase and for penetrant in the binary polymer mixture.</p>        | $\frac{\mu_1^{GAS}}{RT} = \frac{\mu_1^{POL}}{RT}$ <p>where <math display="block">\frac{\mu_1}{RT} = \ln \frac{\phi_1}{\omega_1 r_1} - r_1 \sum_{j=1}^2 \frac{\phi_j l_j}{r_j} + \ln \tilde{\rho} + r_1 (\tilde{v} - 1) \ln(1 - \tilde{\rho}) - \frac{z}{2} r_1 \left[ \tilde{v} - 1 + \frac{q_1}{r_1} \right] \ln \left[ 1 - \tilde{\rho} + \frac{q}{r} \tilde{\rho} \right]</math> <math display="block">+ \frac{z q_1}{2} \left[ \ln \Gamma_{11} + \frac{r_1}{q_1} (\tilde{v} - 1) \ln \Gamma_{00} \right] + r_1 \frac{\tilde{P} \tilde{v}}{\tilde{T}} - \frac{q_1}{\tilde{T}_1} + \frac{\mu_{1,H}}{RT}</math> <p>where</p> <math display="block">\tilde{P} = \frac{P}{P^*}; \quad \tilde{T} = \frac{T}{T^*}; \quad RT^* = P^* v^* = \varepsilon^* \quad \text{with: } \varepsilon^* = \sum_{i=1}^2 \sum_{j=1}^2 \theta_i \theta_j \varepsilon_{ij}^* \quad v^* = 9.75 \text{ cm}^3 / \text{mol}</math> <math display="block">\varepsilon_{12}^* = (1 - k_{12}) \sqrt{\varepsilon_{11}^* \varepsilon_{22}^*}; \quad \text{with } \varepsilon_{ii}^* = \varepsilon_{hi}^* + (T - 298.15) \varepsilon_{s,i}^*</math> <math display="block">\tilde{v} = \frac{V - \sum_i^m \sum_j^n N_{ij} V_{ij}^0}{r N v^*} \quad \text{where } V \text{ is the total volume of the mixture}</math> <math display="block">\tilde{\rho} = 1/\tilde{v}</math> </p> |
| <p>S2. HB contribution to the expression of chemical potential of penetrant. The expression for the <math>\mu_{1,H}</math> is given in a general form which is valid for both pure penetrant (component 1) in the gas phase and for penetrant in the binary polymer mixture.</p> | $\frac{\mu_{1,H}}{RT} = r_1 v_H - \sum_i^m d_i^1 \ln \left( \frac{v_d^i}{v_{i0}} \right) - \sum_j^n a_j^1 \ln \left( \frac{v_a^j}{v_{0j}} \right)$                                                                                                                                                                                                                                                                                                                                                                                                                                                                                                                                                                                                                                                                                                                                                                                                                                                                                                                                                                                                                                                                                                                                                                                                |
| <p>S3. Expression of the EOS. The expression for the EOS is given in a general form which is valid for both pure penetrant (<math>\phi_1=1</math>) in the</p>                                                                                                                    | $\tilde{P} + \tilde{T} \left[ \ln(1 - \tilde{\rho}) - \tilde{\rho} \left( \sum_{i=1}^2 \phi_i \frac{l_i}{r_i} - v_H \right) - \frac{z}{2} \ln \left( 1 - \tilde{\rho} + \frac{q}{r} \tilde{\rho} \right) + \frac{z}{2} \ln \Gamma_{00} \right] = 0$                                                                                                                                                                                                                                                                                                                                                                                                                                                                                                                                                                                                                                                                                                                                                                                                                                                                                                                                                                                                                                                                                               |

|                                                                                                                                                                                                                           |                                                                                                                                                                                                                                                                                                                                                                                                                                                                                                                                                                 |
|---------------------------------------------------------------------------------------------------------------------------------------------------------------------------------------------------------------------------|-----------------------------------------------------------------------------------------------------------------------------------------------------------------------------------------------------------------------------------------------------------------------------------------------------------------------------------------------------------------------------------------------------------------------------------------------------------------------------------------------------------------------------------------------------------------|
| gas phase and for penetrant in the binary polymer mixture.                                                                                                                                                                |                                                                                                                                                                                                                                                                                                                                                                                                                                                                                                                                                                 |
| S4. Average number of hydrogen bonds per molecular segment                                                                                                                                                                | $v_H = \sum_i^m \sum_j^n v_{ij} = \sum_i^m \sum_j^n \frac{N_{ij}}{rN}$                                                                                                                                                                                                                                                                                                                                                                                                                                                                                          |
| S5. Expression obtained by minimizing the Gibbs energy as a function of $N_{ij}$ variable.                                                                                                                                | $\frac{v_{ij}}{v_{i0}v_{0j}} = \tilde{\rho} \exp\left(-\frac{G_{ij}^0}{RT}\right)$ <p>where</p> $G_{ij}^0 = E_{ij}^0 - T \cdot S_{ij}^0 + p \cdot V_{ij}^0$                                                                                                                                                                                                                                                                                                                                                                                                     |
| S6. Expression obtained by minimizing the Gibbs energy as a function of the number of contacts between segment of species $i$ and $j$ (0, 1 and 2 representing, respectively, empty lattice sites, penetrant and polymer) | $\frac{\Gamma_{ii}\Gamma_{jj}}{\Gamma_{ij}^2} = \exp\left(-\frac{\Delta\epsilon_{ij}}{RT}\right)$ <p>where</p> $\Gamma_{ij} = \frac{N_{ij}^{NR}}{N_{ij}^{NR,0}} \quad \text{with } N_{ij}^{NR,0} \text{ representing the effective number of contacts in the compressible lattice between the mers of kind } i \text{ and the mers of kind } j \text{ in the case of random statistics.}$ $\Delta\epsilon_{ij} = \epsilon_{ii} + \epsilon_{jj} - 2(1 - k_{ij})\sqrt{\epsilon_{ii}\epsilon_{jj}} \quad \text{with } \epsilon_{ii} = \epsilon_{ii}^* \frac{2}{z}$ |
| S7. Material balance expression for the non random factors $\Gamma$ s                                                                                                                                                     | $\sum_{i=0}^t \theta_i \theta_r \Gamma_{ij} = 1 \quad j = 0, 1, \dots, t$ <p>where</p> $\theta_r = \sum_{i=1}^t \theta_i$ <p>Here <math>t</math> is the number of components, '0' representing empty sites.</p>                                                                                                                                                                                                                                                                                                                                                 |

|                                                      |                                                                                                                                                                                                                                                          |
|------------------------------------------------------|----------------------------------------------------------------------------------------------------------------------------------------------------------------------------------------------------------------------------------------------------------|
| S8. Definition of the 'close-packed' specific volume | $v_{sp,i}^* = \frac{1}{\rho_i^*} = v_{sp,0i}^* + (T - 298.15)v_{sp,1i}^*$ <p>where <math>v_{sp,1i}^*</math> is a characteristic parameters for different homologous series and <math>\rho_i^*</math> is the 'close-packed' density of component 'i'.</p> |
|------------------------------------------------------|----------------------------------------------------------------------------------------------------------------------------------------------------------------------------------------------------------------------------------------------------------|

**Table S2.** List of relevant equations and related description for **NETGP-NRHB** model.

| Description                                                                                                                                                                                                                                                                                              | Mathematical expression                                                                                                                                                                                                                                                                                                                                                                                                                                                                                                                                                                                                                                                                                                                                                                                                                                                                                                                                                                                                                                                                                                                                                                                                                                                                                                                                                                                                                                                                |
|----------------------------------------------------------------------------------------------------------------------------------------------------------------------------------------------------------------------------------------------------------------------------------------------------------|----------------------------------------------------------------------------------------------------------------------------------------------------------------------------------------------------------------------------------------------------------------------------------------------------------------------------------------------------------------------------------------------------------------------------------------------------------------------------------------------------------------------------------------------------------------------------------------------------------------------------------------------------------------------------------------------------------------------------------------------------------------------------------------------------------------------------------------------------------------------------------------------------------------------------------------------------------------------------------------------------------------------------------------------------------------------------------------------------------------------------------------------------------------------------------------------------------------------------------------------------------------------------------------------------------------------------------------------------------------------------------------------------------------------------------------------------------------------------------------|
| <p>S9. Chemical potential of penetrant according to NRHB theory. Expression A4 still holds also in this case. Moreover, due to the hypothesis of ‘instantaneous’ evolution kinetics for <math>\underline{N}_{ij}</math> and <math>\underline{N}_{rs}^{NR}</math>, also eqs. A5, A6 and A7 hold true.</p> | $\frac{\mu_1^{GAS}}{RT} = \frac{\mu_1^{POL, PE}}{RT}$ <p>where</p> $\begin{aligned} \frac{\mu_1^{GAS}}{RT} = & \ln \frac{\phi_1}{\delta_1 r_1} - r_1 \sum_{j=1}^2 \frac{\phi_j l_j}{r_j} + \ln \tilde{\rho} + r_1 (\tilde{v} - 1) \ln(1 - \tilde{\rho}) - \frac{z}{2} r_1 \left[ \tilde{v} - 1 + \frac{q_1}{r_1} \right] \ln \left[ 1 - \tilde{\rho} + \frac{q}{r} \tilde{\rho} \right] \\ & + \frac{z q_1}{2} \left[ \ln \Gamma_{11} + \frac{r_1}{q_1} (\tilde{v} - 1) \ln \Gamma_{00} \right] + r_1 \frac{\tilde{P} \tilde{v}}{\tilde{T}} - \frac{q_1}{\tilde{T}_1} + \frac{\mu_{1,H}^{GAS}}{RT} \end{aligned}$ $\begin{aligned} \frac{\mu_1^{POL, PE}}{RT} = & \ln \frac{\phi_1}{\delta_1 r_1} - r_1 \sum_{j=1}^2 \frac{\phi_j l_j}{r_j} + \ln \tilde{\rho} + r_1 (\tilde{v} - 1) \ln(1 - \tilde{\rho}) - \frac{z}{2} r_1 \left[ \tilde{v} - 1 + \frac{q_1}{r_1} \right] \ln \left[ 1 - \tilde{\rho} + \frac{q}{r} \tilde{\rho} \right] + \frac{z q_1}{2} \left[ \ln \Gamma_{11} + \frac{r_1}{q_1} (\tilde{v} - \right. \\ & \left. - \frac{q_1}{\tilde{T}_1} + \tilde{T} \left[ \ln(1 - \tilde{\rho}) - \tilde{\rho} \left( \sum_i \phi_i \frac{l_i}{r_i} \right) - \frac{z}{2} \ln \left( 1 - \tilde{\rho} + \frac{q}{r} \tilde{\rho} \right) + \frac{z}{2} \ln \Gamma_{00} \right] \cdot \frac{r x_2 \cdot \frac{\partial \tilde{v}}{\partial x_1} \Big _{P, T, \rho_2, \underline{N}_{ij}, \underline{N}_{rs}^{NR}}}{\tilde{T}} + \frac{\mu_{1,H}^{POL, PE}}{RT} \end{aligned}$ |

|                                                                                                |                                                                                                                                                                                                                                                                                                 |
|------------------------------------------------------------------------------------------------|-------------------------------------------------------------------------------------------------------------------------------------------------------------------------------------------------------------------------------------------------------------------------------------------------|
|                                                                                                | <p>where</p> $1/\tilde{v} = \tilde{\rho} = \rho_2/(\omega_2 \rho^*)$ <p>according to the hypothesis that <math>V_{ij}^0 = 0 \quad \forall i, j</math> ; <math>\rho^*</math> represents the close-packed density of polymer-penetrant mixture</p>                                                |
| S10. HB contribution to the expression of chemical potential of penetrant in the gas phase.    | $\frac{\mu_{1,H}^{GAS}}{RT} = r_1 v_H - \sum_i^m d_i^1 \ln \left( \frac{v_d^i}{v_{i0}} \right) - \sum_j^m a_j^1 \ln \left( \frac{v_a^j}{v_{0j}} \right)$                                                                                                                                        |
| S11. HB contribution to the expression of chemical potential of penetrant in the polymer phase | $\frac{\mu_{1,H}^{POL, PE}}{RT} = r_1 v_H - \sum_i^m d_i^1 \ln \left( \frac{v_d^i}{v_{i0}} \right) - \sum_j^n a_j^1 \ln \left( \frac{v_a^j}{v_{0j}} \right) + v_H \left. \frac{\partial \ln \tilde{v}}{\partial x_1} \right _{P, T, \rho_2, \underline{N}_{ij}, \underline{N}_{rs}^{NR}} x_2 r$ |

**Table S3.** List of relevant symbols and parameters for **NRHB** and **NETGP-NRHB** models, not explicitly defined in the text..

| Description                                                                                                                         | Symbol ( <i>latin letters</i> ) | Dimension                              |
|-------------------------------------------------------------------------------------------------------------------------------------|---------------------------------|----------------------------------------|
| Number of proton acceptor groups of kind $j$ present on a molecule of type 1                                                        | $a_j^1$                         | -                                      |
| Number of proton donor of type $i$ on the molecule of type 1                                                                        | $d_i^1$                         | -                                      |
| Molar internal energy of formation of hydrogen bonding between proton donor group of type $i$ and proton acceptor group of type $j$ | $E_{ij}^0$                      | [J mol <sup>-1</sup> ]                 |
| Molar Gibbs energy of formation of hydrogen bonding between proton donor group of type $i$ and proton acceptor group of type $j$    | $G_{ij}^0$                      | [J mol <sup>-1</sup> ]                 |
| Mean field lattice fluid binary interactional parameter                                                                             | $k_{12}$                        | -                                      |
| Dimensionless parameter of component $i$ defined in ref. [46]                                                                       | $l_j$                           | -                                      |
| Number of types of proton donors                                                                                                    | $m$                             | -                                      |
| Number of types of proton acceptors                                                                                                 | $n$                             | -                                      |
| Number of occupied cells of the lattice in the mixture or in the pure component                                                     | $N$                             | -                                      |
| Number of hydrogen bondings involving a proton donor of type $i$ and a proton acceptor of type $j$                                  | $N_{ij}$                        | -                                      |
| Characteristic pressure of pure components or average characteristic pressure for the mixture                                       | $P^*$                           | [MPa]                                  |
| Average number of lattice contacts per molecule in the mixture                                                                      | $q$                             | -                                      |
| Number of lattice contacts per molecule for component 1                                                                             | $q_1$                           | -                                      |
| Average number of cells occupied per molecule in the mixture                                                                        | $r$                             | -                                      |
| Lattice cells occupied by one molecule of component 1 in the mixture or in the pure phase of component 1                            | $r_1$                           | -                                      |
| Lattice cells occupied by one molecule of component 2 in the mixture or in the pure phase of component 2                            | $r_2$                           | -                                      |
| Universal gas constant                                                                                                              | $R$                             | [J K <sup>-1</sup> mol <sup>-1</sup> ] |
| Molar entropy of formation of hydrogen bonding between the proton donor group of type $i$ and the proton acceptor group of type $j$ | $S_{ij}^0$                      | [J mol <sup>-1</sup> K <sup>-1</sup> ] |
| Characteristic temperature of pure components or average characteristic temperature for the mixture                                 | $T^*$                           | [K]                                    |

|                                                                                                                                         |                               |                                     |
|-----------------------------------------------------------------------------------------------------------------------------------------|-------------------------------|-------------------------------------|
| Scaled temperature of the mixture                                                                                                       | $\tilde{T}$                   | -                                   |
| Scaled temperature of the component 1 in pure phase of component 1 or in the mixture                                                    | $\tilde{T}_1$                 | -                                   |
| 'Close-packed' volume of an elementary cell of the lattice in pure components or in the mixture.                                        | $v^*$                         | $[\text{cm}^3 \text{mol}^{-1}]$     |
| Temperature independent contribution to 'close-packed' specific volume of the pure component of type 1                                  | $v_{sp,01}^*$                 | $[\text{cm}^3 \text{g}^{-1}]$       |
| Temperature independent contribution to 'close-packed' specific volume of the pure component of type 2                                  | $v_{sp,02}^*$                 | $[\text{cm}^3 \text{g}^{-1}]$       |
| Scaled lattice fluid volume of the pure components or of the mixture                                                                    | $\tilde{v}$                   | -                                   |
| Molar volume change upon the formation of hydrogen bonding between proton donor group of type $i$ and proton acceptor group of type $j$ | $V_{ij}^0$                    | $[\text{cm}^3 \text{mol}^{-1}]$     |
| Lattice coordination number                                                                                                             | $z$                           | -                                   |
| <b>Description</b>                                                                                                                      | <b>Symbol (Greek letters)</b> | <b>Dimension</b>                    |
| Non random factor for the distribution of an empty site around another empty site in the lattice                                        | $\Gamma_{00}$                 | -                                   |
| Non random factor for the distribution of a site occupied by component 1 around another site occupied by component 1 in the lattice     | $\Gamma_{11}$                 | -                                   |
| Number of configurations available to a molecule of component 1 in the 'close-packed' state.                                            | $\delta_1$                    | -                                   |
| Lattice fluid interaction energy per mole of contact $i$ - $i$                                                                          | $\varepsilon_{ii}$            | $[\text{J mol}^{-1}]$               |
| Average lattice fluid intersegmental interaction energy per mole of average segment in the polymer-water mixture                        | $\varepsilon^*$               | $[\text{J/mol}]$                    |
| Enthalpic contribution to lattice fluid interaction energy per mole of segment of component 1                                           | $\varepsilon_{h1}^*$          | $[\text{J/mol}]$                    |
| Entropic contribution to lattice fluid interaction energy per mole of segment of component 1                                            | $\varepsilon_{s1}^*$          | $[\text{J mol}^{-1} \text{K}^{-1}]$ |
| Enthalpic contribution to lattice fluid interaction energy per mole of segment of component 2                                           | $\varepsilon_{h2}^*$          | $[\text{J/mol}]$                    |
| Entropic contribution to lattice fluid interaction energy per mole of segment of component 2                                            | $\varepsilon_{s2}^*$          | $[\text{J mol}^{-1} \text{K}^{-1}]$ |
| Average lattice fluid interaction energy per mole of segment of one molecule                                                            | $\varepsilon_{ii}^*$          | $[\text{J mol}^{-1}]$               |

|                                                                                                                                           |                      |                        |
|-------------------------------------------------------------------------------------------------------------------------------------------|----------------------|------------------------|
| of component $i$                                                                                                                          |                      |                        |
| Average lattice fluid interaction energy per mole of average segment in the binary $i$ - $j$ mixture                                      | $\varepsilon_{ij}^*$ | [J mol <sup>-1</sup> ] |
| Surface fraction of component $i$                                                                                                         | $\theta_i$           | -                      |
| Sum of surface fraction of the component 1 and 2                                                                                          | $\theta_r$           | -                      |
| Average number of total hydrogen bonds per molecular segment                                                                              | $\nu_H$              | -                      |
| Average number of un-bonded proton donor of type $i$ per molecular segment                                                                | $\nu_{i0}$           | -                      |
| Average number of proton donor of type $i$ per molecular segment                                                                          | $\nu_d^i$            | -                      |
| Average number of proton acceptor of type $j$ per molecular segment                                                                       | $\nu_a^j$            | -                      |
| Average number of un-bonded proton acceptor of type $j$ per molecular segment                                                             | $\nu_{0j}$           | -                      |
| Average number per molecular segment of hydrogen bonding established between a proton donor of type $i$ and a proton acceptor of type $j$ | $\nu_{ij}$           | -                      |
| ‘Close packed’ density of the polymer-penetrant mixture                                                                                   | $\rho^*$             | [g cm <sup>-3</sup> ]  |
| ‘Close packed’ volumetric fraction of component 1                                                                                         | $\phi_1$             | -                      |
| ‘Close packed’ volumetric fraction of component 2                                                                                         | $\phi_2$             | -                      |
| Mass fraction of component 2                                                                                                              | $\omega_2$           | -                      |
